# Supplementary material
Source: PubMed Central journal article supplement (PMC4251555)
Supplement: NIHMS620955-supplement-Supplemental_Digital_Content.pdf [file NIHMS620955-supplement-Supplemental_Digital_Content.pdf]

## Appendix.

In addition to the authors, other members of the *Eunice Kennedy Shriver* National Institute of Child Health and Human Development Maternal-Fetal Medicine Units Network are as follows:

*University of Alabama at Birmingham, Birmingham, AL* – J.C. Hauth, D.J. Rouse, A. Northen, P. Files, J. Grant, M. Wallace, K. Bailey

*University of Pittsburgh, Pittsburgh, PA* – S. Caritis, T. Kamon (deceased), M. Cotroneo, D. Fischer

*University of Utah, Salt Lake City, UT* – P. Reed, S. Quinn (LDS Hospital), V. Morby (McKay-Dee Hospital), F. Porter (LDS Hospital), R. Silver, J. Miller (Utah Valley Regional Medical Center), K. Hill

*Columbia University, New York, NY* – S. Bousleiman, R. Alcon, K. Saravia, F. Loffredo, A. Bayless (Christiana), C. Perez (St. Peter's University Hospital), M. Lake (St. Peter's University Hospital), M. Talucci

*University of North Carolina at Chapel Hill, Chapel Hill, NC* – K. Boggess, K. Dorman, J. Mitchell, K. Clark, S. Timlin

*Case Western Reserve University-MetroHealth Medical Center, Cleveland, OH* – J. Bailit, C. Milluzzi, W. Dalton, C. Brezine, D. Bazzo

*University of Texas Southwestern Medical Center, Dallas, TX* – J. Sheffield, L. Moseley, M. Santillan, K. Buentipo, J. Price, L. S. Hermann, C. Melton, Y. Gloria-McCutchen, B. Espino

*Northwestern University, Chicago, IL* – M. Dinsmoor (NorthShore University HealthSystem), T. Matson-Manning, G. Mallett

*University of Texas Health Science Center at Houston-Children's Memorial Hermann Hospital, Houston, TX* – S. Blackwell, K. Cannon, S. Lege-Humbert, Z. Spears

*Brown University, Providence, RI* – M. Carpenter, J. Tillinghast, M. Seebeck

*The Ohio State University, Columbus, OH* – J. Iams, F. Johnson, S. Fyffe, C. Latimer, S. Frantz, S. Wylie

*Drexel University, Philadelphia, PA* – M. Talucci, M. Hoffman (Christiana), J. Benson (Christiana), Z. Reid, C. Tocci

*Wake Forest University Health Sciences, Winston-Salem, NC* – M. Harper, P. Meis, M. Swain

*Oregon Health & Science University, Portland, OR* – J. Tolosa, W. Smith, L. Davis, E. Lairson, S. Butcher, S. Maxwell, D. Fisher

*University of Texas Medical Branch, Galveston, TX* – J. Moss, B. Stratton, G. Hankins, J. Brandon, C. Nelson-Becker, G. Olson, L. Pacheco

*Wayne State University, Detroit, MI* – G. Norman, S. Blackwell, P. Lockhart, D. Driscoll, M. Dombrowski

*The George Washington University Biostatistics Center, Washington, DC* – E. Thom, T. Boekhoudt, L. Leuchtenburg, T. Williams

*National Heart, Lung, and Blood Institute, Bethesda, MD* – G. Pearson, V. Pemberton, J. Cutler, W. Barouch

*Eunice Kennedy Shriver National Institute of Child Health and Human Development, Bethesda, MD* – C. Spong, S. Tolivaisa

MFMU Network Steering Committee Chair (*University of Texas Medical Center, Galveston, TX*) – G.D. Anderson, M.D.

Cantu J, Clifton RG, Roberts JM, Leveno KJ, Myatt L Reddy UM, et al. Laboratory abnormalities in pregnancy-associated hypertension: frequency and association with pregnancy outcomes. *Obstet Gynecol* 2014;124.

The authors provided this information as a supplement to their article.
